# Supplementary material
Source: HighWire-hosted journal article supplement (https://jitc.bmj.com/content/8/1/e000272)
Supplement: inline-supplementary-material-3 [file inline-supplementary-material-3.pdf]

| Measurand                                                      | Sample | Stain | N  | NAs | Mean    | SD     | RSD   | Sr (Repeatability) | Global Repeatability |
|----------------------------------------------------------------|--------|-------|----|-----|---------|--------|-------|--------------------|----------------------|
| Densities<br>Dupl. adjacent slides<br>(Cells/mm <sup>2</sup> ) | S1     | CD3   | 44 | 0   | 372.45  | 136.68 | 36.70 | 40.03              | 90.66                |
|                                                                | S1     | CD8   | 44 | 4   | 84.22   | 55.83  | 66.29 |                    |                      |
|                                                                | S2     | CD3   | 48 | 0   | 550.44  | 178.86 | 32.50 | 73.18              |                      |
|                                                                | S2     | CD8   | 48 | 0   | 295.12  | 174.01 | 58.96 |                    |                      |
|                                                                | S3     | CD3   | 36 | 0   | 1603.67 | 496.92 | 30.99 | 141.87             |                      |
|                                                                | S3     | CD8   | 36 | 0   | 631.81  | 214.88 | 34.01 |                    |                      |
| Mean Percentile<br>Dupl. adjacent slides<br>(%)                | S1     | -     | 44 | 4   | 15.94   | 4.10   | 25.72 | 2.91               | 3.92                 |
|                                                                | S2     | -     | 48 | 0   | 44.64   | 8.33   | 18.66 | 5.21               |                      |
|                                                                | S3     | -     | 36 | 0   | 85.62   | 2.94   | 3.43  | 2.84               |                      |

**Table S1.**
