# Supplementary material
Source: HighWire-hosted journal article supplement (https://jitc.bmj.com/content/8/1/e000272)
Supplement: inline-supplementary-material-4 [file inline-supplementary-material-4.pdf]

| Statistics                        | Sample | total      | AB Lot    | Instr.  | Rev.      | Run     | Op.     |
|-----------------------------------|--------|------------|-----------|---------|-----------|---------|---------|
| mean percentile<br>% SD [95% CI]  | S1     | 4 [3;8]    | 1 [0;2]   | 0 [0;0] | 2 [0;5]   | 0 [0;0] | 0 [0;0] |
|                                   | S2     | 10 [6;26]  | 4 [0;8]   | 0 [0;0] | 8 [0;14]  | 0 [0;0] | 0 [0;0] |
|                                   | S3     | 3 [2;7]    | 0 [0;0]   | 0 [0;0] | 2 [0;4]   | 0 [0;0] | 0 [0;2] |
| mean percentile<br>% RSD [95% CI] | S1     | 28 [19;49] | 4 [0;15]  | 0 [0;0] | 15 [0;29] | 0 [0;0] | 0 [0;0] |
|                                   | S2     | 23 [14;58] | 10 [0;18] | 0 [0;0] | 17 [0;31] | 0 [0;0] | 0 [0;0] |
|                                   | S3     | 4 [2;8]    | 0 [0;0]   | 0 [0;0] | 3 [0;5]   | 0 [0;0] | 0 [0;2] |

**Table S2.**
