# Supplementary material
Source: HighWire-hosted journal article supplement (https://jitc.bmj.com/content/8/1/e000272)

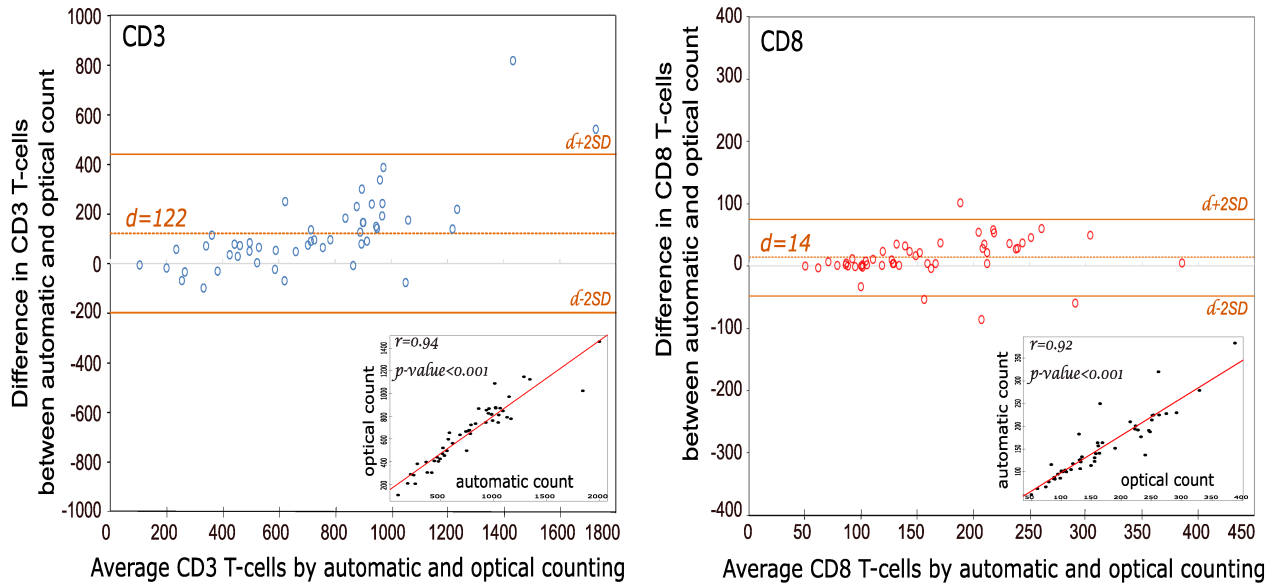**Figure S1.**

Supplement: inline-supplementary-material-1 [file inline-supplementary-material-1.pdf]

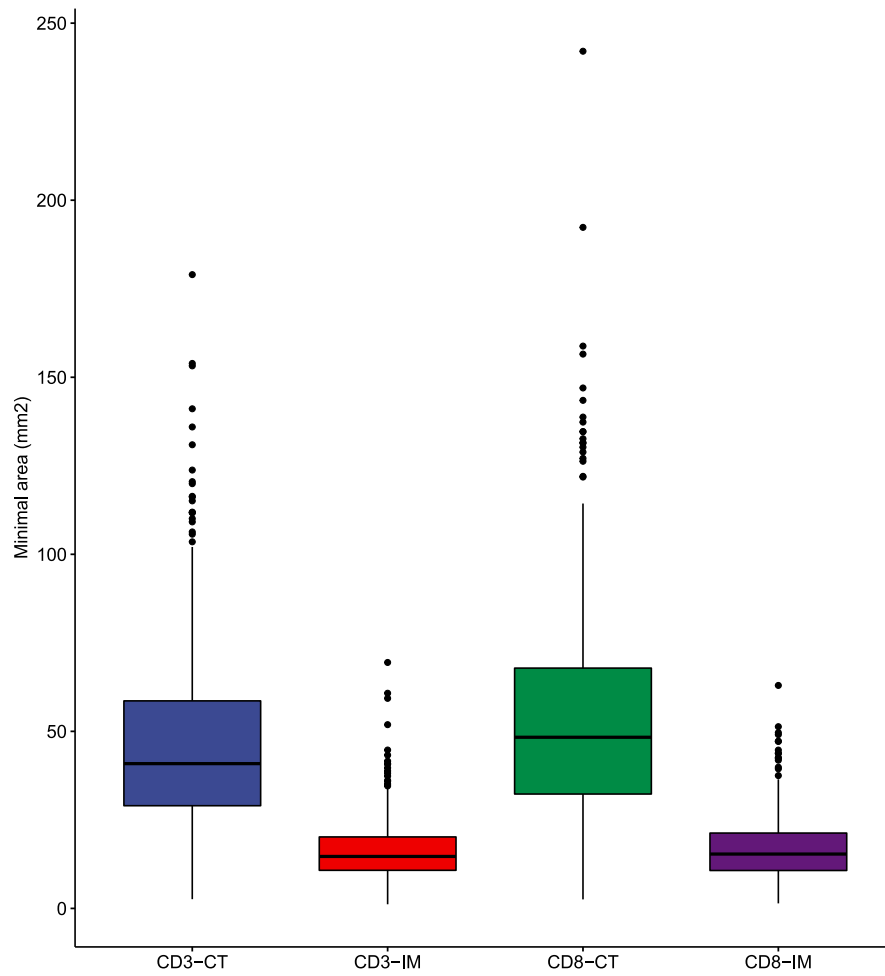**Figure S2.**

Supplement: inline-supplementary-material-2 [file inline-supplementary-material-2.pdf]

A

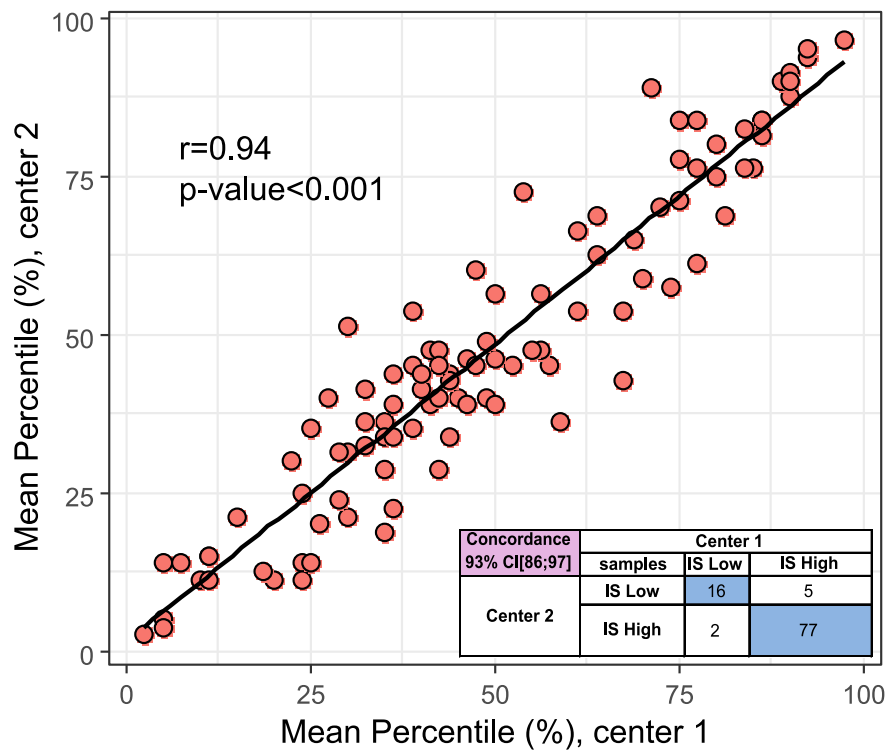

Figure S3.

Supplement: inline-supplementary-material-5 [file inline-supplementary-material-5.pdf]

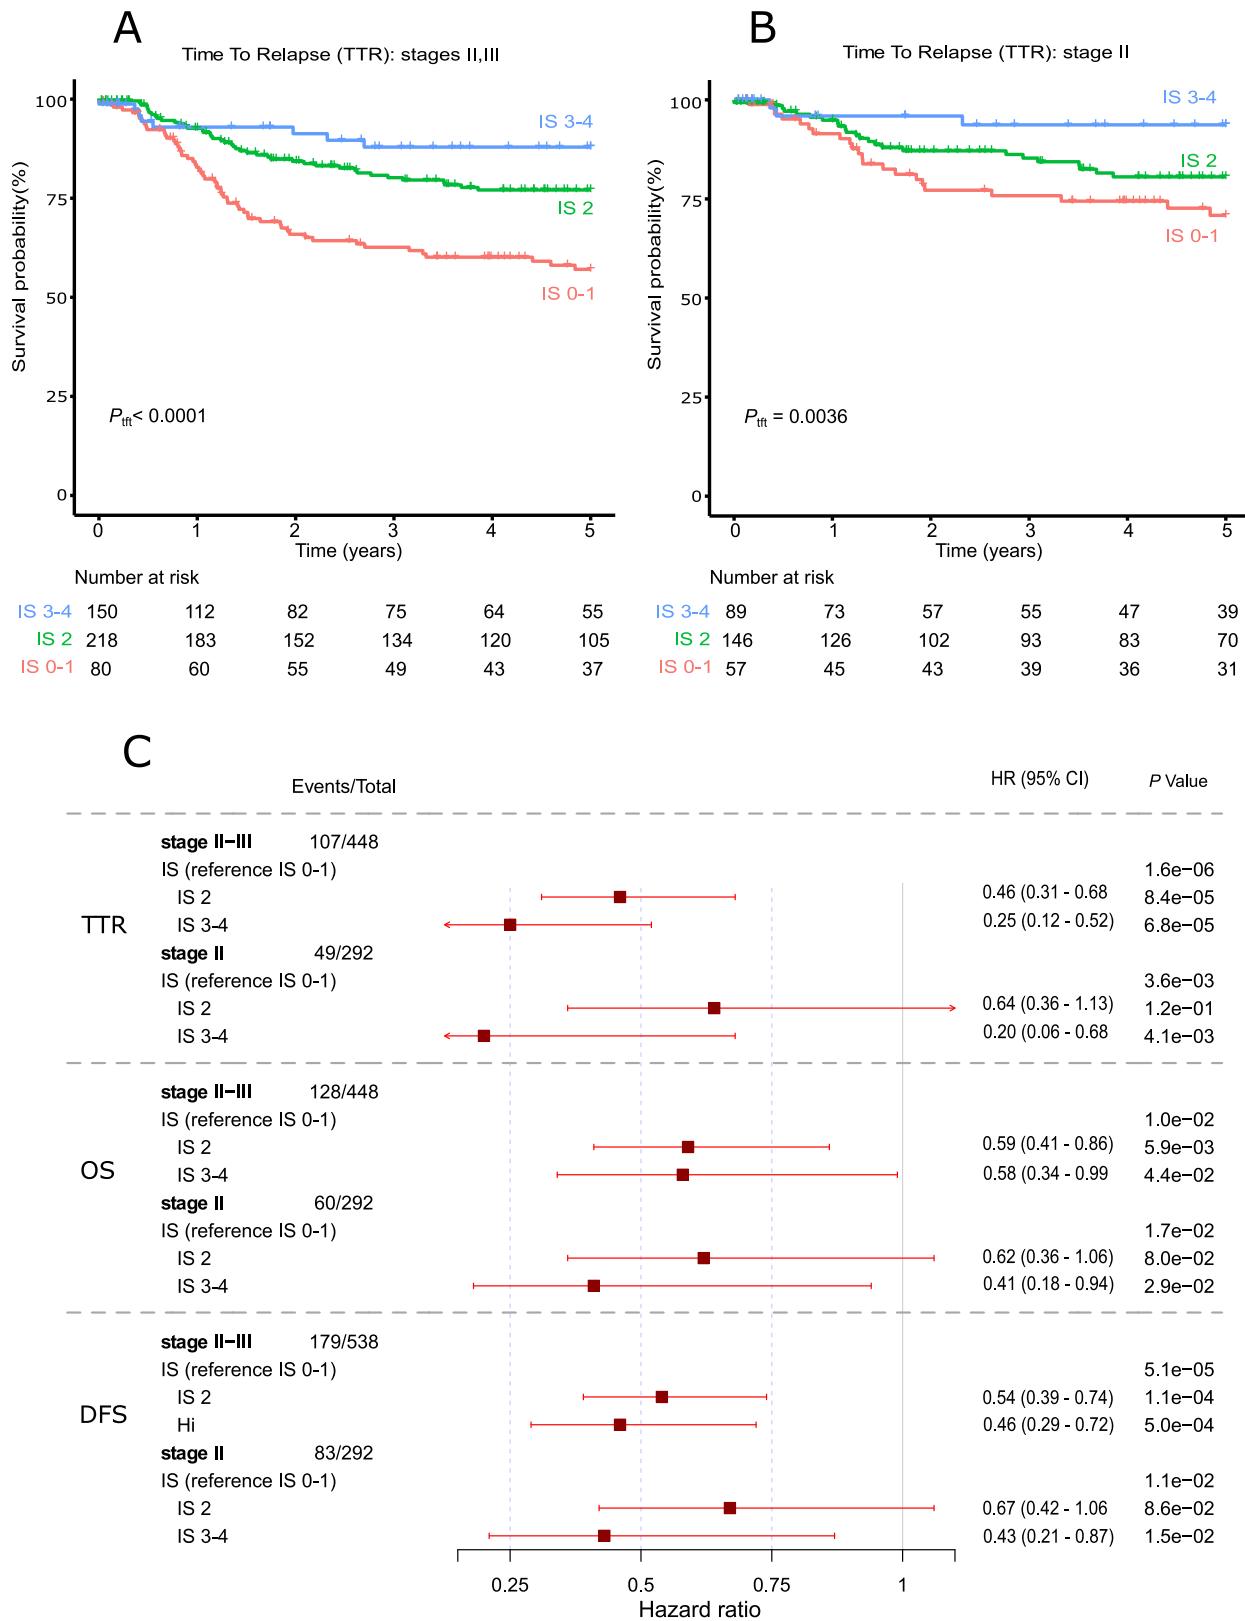

**Figure S4.**

Supplement: inline-supplementary-material-6 [file inline-supplementary-material-6.pdf]
